# Supplementary material
Source: PubMed Central journal article supplement (PMC9274861)
Supplement: sj-pdf-1-jcb-10.1177_0271678X221086408.pdf [file sj-pdf-1-jcb-10.1177_0271678X221086408.pdf]

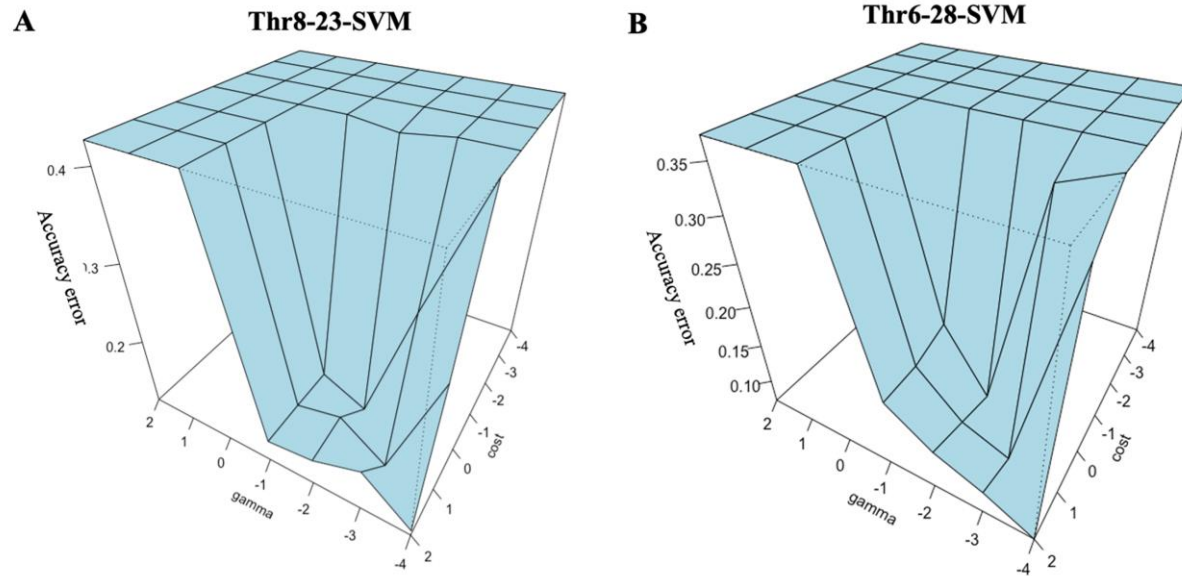

**Supplementary Figure 1.** Hyperparameter tuning plot of 2 SVM classifiers. Hyperparameters were tuned with gamma and cost value. Performance of the Thr8-23-SVM (A) and Thr6-28-SVM (B) measured by accuracy error were plotted. Both the gamma value and cost parameter C were tested for 0.0001,0.001,0.01,0.1,1.0,10, and 100. Both parameters were transformed by log10.
