# Supplementary material
Source: PubMed Central journal article supplement (PMC9274861)
Supplement: sj-pdf-2-jcb-10.1177_0271678X221086408.pdf [file sj-pdf-2-jcb-10.1177_0271678X221086408.pdf]

**Supplementary Table 1. ICC of radiomics features extracted from different perfusion maps**

| <b>Maps</b> | <b>First order</b> | <b>GLCM</b> | <b>GLRLM</b>  | <b>Log</b>        | <b>Wavelet</b>    |
|-------------|--------------------|-------------|---------------|-------------------|-------------------|
| CBF         | 18/18              | 22/22       | 16/16         | 276/280 (98.6%)   | 221/224 (98.7%)   |
| CBV         | 18/18              | 22/22       | 16/16         | 276/280 (98.6%)   | 218/224 (97.3%)   |
| MAX         | 18/18              | 22/22       | 16/16         | 264/280 (94.3%)   | 214/224 (95.5%)   |
| MTT         | 15/18 (83.3%)      | 22/22       | 16/16         | 261/280 (93.2%)   | 204/224 (91.1%)   |
| TTP         | 18/18              | 22/22       | 12/16 (75%)   | 259/280 (92.5%)   | 210/224 (93.8%)   |
| Sum         | 85/90 (94.4%)      | 110/110     | 72/80 (90.0%) | 1336/1400 (95.4%) | 1067/1120 (95.3%) |
