# Supplementary material
Source: PubMed Central journal article supplement (PMC9274861)
Supplement: sj-pdf-3-jcb-10.1177_0271678X221086408.pdf [file sj-pdf-3-jcb-10.1177_0271678X221086408.pdf]

**Supplementary Table 2. Features included in the 2 SVM models**

| <b>Features included in the Thr8-23-SVM model</b>      | <b>Features included in the Thr6-28-SVM model</b> |
|--------------------------------------------------------|---------------------------------------------------|
| CBFwavelet.HL_firstorder_Kurtosis                      | CBFlog.sigma.4.0.mm_glrml_LowGrayLevelRunEmphasis |
| CBFwavelet.LL_glcm_Correlation                         | CBFwavelet.LL_glcm_Correlation                    |
| CBVwavelet.HL_firstorder_90Percentile                  | CBVlog.sigma.1.0.mm_firstorder_Skewness           |
| CBVwavelet.HL_firstorder_Kurtosis                      | CBVlog.sigma.2.0.mm_glcm_Imc1                     |
| CBVwavelet.LL_firstorder_10Percentile                  | CBVlog.sigma.3.0.mm_glcm_Imc1                     |
| MAXlog.sigma.3.0.mm_glrml_LongRunHighGrayLevelEmphasis | CBVlog.sigma.4.0.mm_glcm_Correlation              |
| MAXlog.sigma.5.0.mm_glcm_MaximumProbability            | CBVoriginal_firstorder_Skewness                   |
| MAXwavelet.HH_firstorder_Mean                          | CBVwavelet.HL_glcm_MaximumProbability             |
| MAXwavelet.HH_glcm_Imc1                                | CBVwavelet.HL_glrml_GrayLevelNonUniformity        |
| MAXwavelet.LH_glcm_Correlation                         | MAXlog.sigma.3.0.mm_glcm_Imc2                     |
| MAXwavelet.LL_firstorder_Skewness                      | MAXoriginal_firstorder_Minimum                    |
| MAXwavelet.LL_glcm_ClusterShade                        | MAXwavelet.HH_glcm_Imc1                           |
| MAXwavelet.LL_glrml_ShortRunLowGrayLevelEmphasis       | MAXwavelet.LH_firstorder_Energy                   |
| MTTwavelet.HL_glcm_Imc2                                | MAXwavelet.LH_firstorder_TotalEnergy              |
| TTPlog.sigma.3.0.mm_glcm_MaximumProbability            | MAXwavelet.LL_firstorder_Skewness                 |
| TTPlog.sigma.4.0.mm_firstorder_Skewness                | MTTlog.sigma.4.0.mm_glcm_MaximumProbability       |
| TTPoriginal_firstorder_Minimum                         | MTTwavelet.HL_glcm_Imc2                           |
| TTPoriginal_glcm_Imc1                                  | TTPlog.sigma.1.0.mm_firstorder_Maximum            |

|                                                   |                                                   |
|---------------------------------------------------|---------------------------------------------------|
| TTPoriginal_grlm_RunLengthNonUniformityNormalized | TTPlog.sigma.1.0.mm_glcm_Correlation              |
| TTPoriginal_shape_Sphericity                      | TTPlog.sigma.5.0.mm_firstorder_Kurtosis           |
| TTPwavelet.HH_glcm_ClusterShade                   | TTPoriginal_glcm_Imc1                             |
| TTPwavelet.HL_glcm_Idmn                           | TTPoriginal_glcm_Imc2                             |
| TTPwavelet.LH_glcm_Idmn                           | TTPoriginal_grlm_RunLengthNonUniformityNormalized |
|                                                   | TTPoriginal_shape_Sphericity                      |
|                                                   | TTPwavelet.HL_firstorder_Kurtosis                 |
|                                                   | TTPwavelet.HL_glcm_ClusterProminence              |
|                                                   | TTPwavelet.LH_firstorder_Median                   |
|                                                   | TTPwavelet.LH_glcm_Imc2                           |
